# Supplementary material for: Synthesis of Marine α-Methoxylated Fatty Acid Analogs that Effectively Inhibit the Topoisomerase IB from Leishmania donovani with a Mechanism Different from that of Camptothecin
Source: Mar Drugs. 2013 Sep 30;11(10):3661–75. doi: 10.3390/md11103661 (PMC3826128; doi:10.3390/md11103661)
Supplement: Supplementary File 1 — 3D structure (MOL, 2 KB) [file marinedrugs-11-03661-s001.mol]

marinedrugs-11-03661-s001.mol
  ChemDraw10311314112D

 24 23  0  0  0  0  0  0  0  0999 V2000
   -5.9413   -0.3381    0.0000 C   0  0  0  0  0  0  0  0  0  0  0  0
   -5.2268    0.0745    0.0000 C   0  0  0  0  0  0  0  0  0  0  0  0
   -4.5124   -0.3381    0.0000 C   0  0  0  0  0  0  0  0  0  0  0  0
   -3.7979    0.0745    0.0000 C   0  0  0  0  0  0  0  0  0  0  0  0
   -3.0827   -0.3381    0.0000 C   0  0  0  0  0  0  0  0  0  0  0  0
   -2.3684    0.0745    0.0000 C   0  0  0  0  0  0  0  0  0  0  0  0
   -1.6539   -0.3381    0.0000 C   0  0  0  0  0  0  0  0  0  0  0  0
   -0.9394    0.0745    0.0000 C   0  0  0  0  0  0  0  0  0  0  0  0
   -0.2250   -0.3381    0.0000 C   0  0  0  0  0  0  0  0  0  0  0  0
    0.4896    0.0745    0.0000 C   0  0  0  0  0  0  0  0  0  0  0  0
    1.2040   -0.3381    0.0000 C   0  0  0  0  0  0  0  0  0  0  0  0
   -6.6558    0.0745    0.0000 C   0  0  0  0  0  0  0  0  0  0  0  0
    1.6962    0.0680    0.0000 C   0  0  0  0  0  0  0  0  0  0  0  0
    3.4081    0.0680    0.0000 C   0  0  0  0  0  0  0  0  0  0  0  0
    3.9655   -0.3653    0.0000 C   0  0  0  0  0  0  0  0  0  0  0  0
    4.6669    0.0680    0.0000 C   0  0  0  0  0  0  0  0  0  0  0  0
    5.2855   -0.3653    0.0000 C   0  0  0  0  0  0  0  0  0  0  0  0
    5.9044    0.0267    0.0000 C   0  0  0  0  0  0  0  0  0  0  0  0
    6.6558   -0.4117    0.0000 O   0  0  0  0  0  0  0  0  0  0  0  0
    2.1086    0.0704    0.0000 C   0  0  0  0  0  0  0  0  0  0  0  0
    2.9336    0.0704    0.0000 C   0  0  0  0  0  0  0  0  0  0  0  0
    5.9044    0.8516    0.0000 O   0  0  0  0  0  0  0  0  0  0  0  0
    4.9281   -0.5709    0.0000 O   0  0  0  0  0  0  0  0  0  0  0  0
    5.4142   -0.8516    0.0000 C   0  0  0  0  0  0  0  0  0  0  0  0
  1  2  1  0      
  2  3  1  0      
  4  5  1  0      
  5  6  1  0      
  6  7  1  0      
  7  8  1  0      
  8  9  1  0      
  9 10  1  0      
 10 11  1  0      
  1 12  1  0      
 11 13  1  0      
 14 15  1  0      
 15 16  1  0      
 16 17  1  0      
 17 18  1  0      
 18 19  1  0      
 20 21  3  0      
 13 20  1  0      
 21 14  1  0      
 18 22  2  0      
  3  4  1  0      
 23 24  1  0      
 17 23  1  0      
M  STY  1   1 SUP
M  SLB  1   1   1
M  SAL   1  2  23  24
M  SBL   1  1  23
M  SMT   1 OCH3
M  SBV   1 23   -7.7017    6.3005
M  END
