# Supplementary material for: Synthesis of Marine α-Methoxylated Fatty Acid Analogs that Effectively Inhibit the Topoisomerase IB from Leishmania donovani with a Mechanism Different from that of Camptothecin
Source: Mar Drugs. 2013 Sep 30;11(10):3661–75. doi: 10.3390/md11103661 (PMC3826128; doi:10.3390/md11103661)
Supplement: Supplementary File 2 — MOL-Document (MOL, 2 KB) [file marinedrugs-11-03661-s001-mod.mol]

marinedrugs-11-03661-s001.mol
  corina  11121305313D 1   1.00000     0.00000 
CORINA 3.49 0023  12.04.2013
 24 23  0  0  0  0  0  0  0  0999 V2000
   -0.0187    1.5258    0.0104 C   0  0  0  0  0  0  0  0  0  0  0  0
    0.0021   -0.0041    0.0020 C   0  0  0  0  0  0  0  0  0  0  0  0
   -1.4333   -0.5336    0.0129 C   0  0  0  0  0  0  0  0  0  0  0  0
   -1.4126   -2.0635    0.0045 C   0  0  0  0  0  0  0  0  0  0  0  0
   -2.8479   -2.5931    0.0153 C   0  0  0  0  0  0  0  0  0  0  0  0
   -2.8272   -4.1229    0.0069 C   0  0  0  0  0  0  0  0  0  0  0  0
   -4.2626   -4.6525    0.0178 C   0  0  0  0  0  0  0  0  0  0  0  0
   -4.2418   -6.1823    0.0094 C   0  0  0  0  0  0  0  0  0  0  0  0
   -5.6772   -6.7119    0.0202 C   0  0  0  0  0  0  0  0  0  0  0  0
   -5.6565   -8.2417    0.0118 C   0  0  0  0  0  0  0  0  0  0  0  0
   -7.0918   -8.7713    0.0227 C   0  0  0  0  0  0  0  0  0  0  0  0
    1.4167    2.0553   -0.0004 C   0  0  0  0  0  0  0  0  0  0  0  0
   -7.0711  -10.3012    0.0143 C   0  0  0  0  0  0  0  0  0  0  0  0
  -10.9344  -11.7265    0.0435 C   0  0  0  0  0  0  0  0  0  0  0  0
  -10.9137  -13.2564    0.0351 C   0  0  0  0  0  0  0  0  0  0  0  0
  -12.3491  -13.7859    0.0459 C   0  0  0  0  0  0  0  0  0  0  0  0
  -12.3283  -15.3158    0.0375 C   0  0  0  0  0  0  0  0  0  0  0  0
  -13.7355  -15.8380    0.1720 C   0  0  0  0  0  0  0  0  0  0  0  0
  -14.4297  -15.6141    1.2988 O   0  0  0  0  0  0  0  0  0  0  0  0
   -8.4521  -10.8107    0.0247 C   0  0  0  0  0  0  0  0  0  0  0  0
   -9.5535  -11.2170    0.0330 C   0  0  0  0  0  0  0  0  0  0  0  0
  -14.2390  -16.4582   -0.7345 O   0  0  0  0  0  0  0  0  0  0  0  0
  -11.7642  -15.7778   -1.1915 O   0  0  0  0  0  0  0  0  0  0  0  0
  -11.0822  -17.0289   -1.0839 C   0  0  0  0  0  0  0  0  0  0  0  0
  1  2  1  0      
  2  3  1  0      
  4  5  1  0      
  5  6  1  0      
  6  7  1  0      
  7  8  1  0      
  8  9  1  0      
  9 10  1  0      
 10 11  1  0      
  1 12  1  0      
 11 13  1  0      
 14 15  1  0      
 15 16  1  0      
 16 17  1  0      
 17 18  1  0      
 18 19  1  0      
 20 21  3  0      
 13 20  1  0      
 21 14  1  0      
 18 22  2  0      
  3  4  1  0      
 23 24  1  0      
 17 23  1  0      
M  STY  1   1 SUP
M  SLB  1   1   1
M  SAL   1  2  23  24
M  SBL   1  1  23
M  SMT   1 OCH3
M  SBV   1 23   -7.7017    6.3005
M  END
$$$$
